# Supplementary material for: Morphological and Genetic Variability in Radix auricularia (Mollusca: Gastropoda: Lymnaeidae) of Lake Baikal, Siberia: The Story of an Unfinished Invasion into the Ancient Deepest Lake
Source: MDPI journal article supplement (doi:10.3390/d14070527), 2022-06-29
Supplement: s1 [file s1]

## Supplementary info

**Table S1.** The data on specimens of lymnaeid snails used in the molecular study

| Code                                                   | Collection No.<br>SNSD | Locality                                                                                                             | ENA/GenBank No. |          |                      |
|--------------------------------------------------------|------------------------|----------------------------------------------------------------------------------------------------------------------|-----------------|----------|----------------------|
|                                                        |                        |                                                                                                                      | cyt-b           | ITS-2    | Reference            |
| <i>Austropeplea viridis</i> (Quoy & Gaimard, 1833)     |                        |                                                                                                                      |                 |          |                      |
| <i>Austropeplea viridis</i> 1                          | Moll S5418             | China, Province Gansu, Wenxian, N 32.93013° E 104.72156°                                                             |                 | LT220499 | SCHNIEBS et al. 2017 |
|                                                        |                        |                                                                                                                      | OM319403        |          | This paper           |
| <i>Austropeplea viridis</i> 2                          | Moll S6832             | Mongolia, small pool in the floodplain of Khovd River, N 48° 13.718' E 91° 55.408'                                   |                 | LT220500 | SCHNIEBS et al. 2017 |
|                                                        |                        |                                                                                                                      | OM319404        |          | This paper           |
| <i>Radix natalensis</i> (KRAUSS 1848)                  |                        |                                                                                                                      |                 |          |                      |
| <i>Radix natalensis</i> 1                              | Tissue coll. 3252      | Egypt, Cairo, Lotus basin in front of the Egyptian Museum, N 30.047038 E 31.233659                                   | LS974266        | LS974223 | SCHNIEBS et al. 2019 |
| <i>Radix natalensis</i> 2                              | Tissue coll. 3253      | Egypt, Cairo, Lotus basin in front of the Egyptian Museum, N 30.047038 E 31.233659                                   | LS974267        | LS974224 | SCHNIEBS et al. 2019 |
| <i>Radix rubiginosa</i> (Michelin, 1831)               |                        |                                                                                                                      |                 |          |                      |
| <i>Radix rubiginosa</i> 1                              |                        | Russia, St. Petersburg; Botanical Gardens of Peter the Great, Victoria regia greenhouse, N 59°58'09.9" E 13°19'27.0" | OM319405        | OM240663 | This paper           |
| <i>Radix rubiginosa</i> 2                              |                        | Russia, St. Petersburg; Botanical Gardens of Peter the Great, Victoria regia greenhouse, N 59°58'09.9" E 13°19'27.0" | OM319406        | OM240664 | This paper           |
| <i>Radix dolgini</i> (GUNDRIZER AND STAROBOGATOV 1979) |                        |                                                                                                                      |                 |          |                      |
| <i>Radix dolgini</i> 1                                 | Moll 52861             | Russia, Tomsk Region, District Teguldet, lake near Novoshumilovo village, N 57°25'30" E 88°31'13"                    | LS974268        |          | SCHNIEBS et al. 2019 |
|                                                        |                        |                                                                                                                      |                 | KT030064 | VINARSKI et al. 2016 |
| <i>Radix dolgini</i> 2                                 | Moll 52863             | Russia, Tomsk Region, District Teguldet, lake near Novoshumilovo village, N 57°25'30" E 88°31'13"                    | LS974270        |          | SCHNIEBS et al. 2019 |
|                                                        |                        |                                                                                                                      |                 | KT030066 | VINARSKI et al. 2016 |
| <i>Radix dolgini</i> 3                                 | Moll S5217             | Russia, Altay Territory, a swamp in the floodplain of Kulunda River, N 50°59'50" E 80°00'07"                         | LS974271        |          | SCHNIEBS et al. 2019 |
|                                                        |                        |                                                                                                                      |                 | KT030061 | VINARSKI et al. 2016 |

|                                         |             |                                                                                                                            |          |          |                      |
|-----------------------------------------|-------------|----------------------------------------------------------------------------------------------------------------------------|----------|----------|----------------------|
| <i>Radix dolgini</i> 4                  | Moll S5218  | Russia, Altay Territory, a swamp in the floodplain of Kulunda River, N 50°59'50" E 80°00'07"                               | LS974272 |          | SCHNIEBS et al. 2019 |
|                                         |             |                                                                                                                            |          | KT030062 | VINARSKI et al. 2016 |
| <i>Radix labiata</i> (ROSSMÄSSLER 1835) |             |                                                                                                                            |          |          |                      |
| <i>Radix labiata</i> 1                  | Moll 51863  | Montenegro, Žabljak, Black Lake, sand pools, 43°08'50"N 19°05'42"E                                                         | HE798507 | HE798455 | SCHNIEBS et al. 2013 |
| <i>Radix labiata</i> 2                  | Moll 52415  | Austria, Carinthia, Hermagor, N 46°37' E 13°22'                                                                            | HE798484 | HE798457 | SCHNIEBS et al. 2013 |
| <i>Radix labiata</i> 3                  | Tissue 3956 | Spain, Santa Marina del Valdeon, Picos de Europa, Vega de Liordes, marshy headwater region, 1940 m, 43°09'11" N 4°50'09" W | HE798491 | HE798464 | SCHNIEBS et al. 2013 |
| <i>Radix labiata</i> 4                  | Moll S172   | France, Bourgogne, Département Cote-d'Or                                                                                   | HE798492 | HE798465 | SCHNIEBS et al. 2013 |
| <i>Radix labiata</i> 5                  | Moll S284   | Switzerland, Basel City, Riehen, well Nollenbrunnen, 47°34'41" N 7°40'17" E                                                | HE798493 | HE798466 | SCHNIEBS et al. 2013 |
| <i>Radix labiata</i> 6                  | Moll S2904  | Germany, Saxony, small brook north of Tharandt, N 51°00'08" E 13°34'19"                                                    | HE798496 | HE798469 | SCHNIEBS et al. 2013 |
| <i>Radix balthica</i> (LINNAEUS 1758)   |             |                                                                                                                            |          |          |                      |
| <i>Radix balthica</i> 1                 | Moll 51292  | Switzerland, canton Basel City, Riehen, Wiesengriener, 47°35'21" N 07°38'32" E                                             | HE573134 | HE573083 | SCHNIEBS et al. 2011 |
| <i>Radix balthica</i> 2                 | Moll 51860  | Sweden, Øland, east shore near Lille Seby, 56.345°N 16.565°E                                                               | HE573141 | HE573090 | SCHNIEBS et al. 2011 |
| <i>Radix balthica</i> 3                 | Moll 52412  | Croatia, Lake Milanovac near Plitvica, 44°53'45" N 15°36'34" E                                                             | HE573139 | HE573089 | SCHNIEBS et al. 2011 |
| <i>Radix balthica</i> 4                 | Moll 52663  | Germany, Baden-Württemberg, Danube River near Sigmaringendorf, 48°03'45.54" N 09°15'49.36" E                               | HE573120 | HE573080 | SCHNIEBS et al. 2011 |
| <i>Radix balthica</i> 5                 | Moll 52907  | Germany, Saxony, pond Rummelteich southwest of Trebsen, R 4552057 H 5683105                                                | LS974275 | LS974227 | SCHNIEBS et al. 2019 |
| <i>Radix balthica</i> 6                 | Moll 53111  | Germany, Baden-Württemberg, Konstanz-Egg, pond near University, N 47°41'09" E 09°11'29"                                    | HE573116 | HE573078 | SCHNIEBS et al. 2011 |
| <i>Radix balthica</i> 7                 | Moll S2151  | Germany, Mecklenburg-Western Pomerania, Lake Torgelower See, N 53°34.252' E 12°46.622'                                     | HE573159 | HE573096 | SCHNIEBS et al. 2011 |
| <i>Radix balthica</i> 8                 | Moll S4443  | Italy, Sardinia, Province Nuoro, Gola su Gorrupu, Rio Flumineddo River, N 40°11'07.14 E 9°30'08.57 E                       | LR732147 | LR732161 | SCHNIEBS et al. 2020 |

|                                                 |                   |                                                                                                              |          |          |                         |
|-------------------------------------------------|-------------------|--------------------------------------------------------------------------------------------------------------|----------|----------|-------------------------|
| <i>Radix balthica</i> 9                         | Moll S5621        | Germany, Bavaria, bank of the Lake Chiemsee in Chieming,<br>N 47°53'46" E 12°31'38"                          | LR732148 | LR732162 | SCHNIEBS et al.<br>2020 |
| <i>Radix balthica</i> 10                        | Moll S5795        | Switzerland, Feldmeilen, bank of the Lake Zurich, N 47°16'18.16" E 08°37'40.46"                              | LR732149 | LR732163 | SCHNIEBS et al.<br>2020 |
| <b><i>Radix lagotis</i> (SCHRANK 1803)</b>      |                   |                                                                                                              |          |          |                         |
| <i>Radix lagotis</i> 1                          | Moll 49868        | Germany, Saxony, pond Vierteich near Freiteilsdorf, 13°41'57"E 51°15'43"                                     | HE573114 | HE573076 | SCHNIEBS et al.<br>2011 |
| <i>Radix lagotis</i> 2                          | Moll 51858        | Germany, Brandenburg, Strodehne, N 51.74555° E 12.22396°                                                     | LN874262 | LN874255 | SCHNIEBS et al.<br>2015 |
| <i>Radix lagotis</i> 3                          | Moll 52563        | Saxony, pond Goldgrubenteich near Linz, 13°43'09"E 51°19'46"N                                                | HE573115 | HE573077 | SCHNIEBS et al.<br>2011 |
| <i>Radix lagotis</i> 4                          | Moll 53236        | Saxony, dam Doellnitzsee near Mutzschen, 12°55'18"E 51°15'45"N                                               | LS974273 | LS974225 | SCHNIEBS et al.<br>2019 |
| <i>Radix lagotis</i> 5                          | Moll S1777        | Ukraine: Donetsk Region, Staromarjevka, Kalmius River                                                        | LS974274 | LS974226 | SCHNIEBS et al.<br>2019 |
| <i>Radix lagotis</i> 6                          | Moll S3765        | Bulgaria. Dragoman marshland 40 km west of Sofia, N 42°56'11.7" E 22°57'9.3"                                 | LN874264 | LN874257 | SCHNIEBS et al.<br>2015 |
| <i>Radix lagotis</i> 7                          | Moll S3770        | Bulgaria. Dragoman marshland 40 km west of Sofia, N 42°56'11.7" E 22°57'9.3"                                 | LN874266 | LN874259 | SCHNIEBS et al.<br>2015 |
| <b><i>Radix ampla</i> (HARTMANN 1821)</b>       |                   |                                                                                                              |          |          |                         |
| <i>Radix ampla</i> 1                            | Moll 51113        | Russia, Chelyabinsk Region, Miass River near Dynamo village, N 45°57' E 60°02'                               | HE798471 | HE798449 | SCHNIEBS et al.<br>2013 |
| <i>Radix ampla</i> 2                            | Moll S2193        | Germany, Mecklenburg-Western Pomerania, Lake Luebkowsee 2 km east of Schwichtenberg, 13°44.567'E 53°40.967'N | HE573112 | HE573074 | SCHNIEBS et al.<br>2011 |
| <i>Radix ampla</i> 3                            | Moll S2924        | Switzerland: Lake Biel, near bridge to St. Peter's Island                                                    | LS974281 | LS974232 | SCHNIEBS et al.<br>2019 |
| <i>Radix ampla</i> 4                            | Moll S5347        | Czech Republic, Vsetín, Vsetínská Bečva, N 49°19'29" E 17°59'48"                                             | LS974286 | LS974237 | SCHNIEBS et al.<br>2019 |
| <i>Radix ampla</i> 5                            | Moll S7478        | Germany, Mecklenburg-Western Pomerania, Lake Tollensesee, N 53.470790 E 13.174872                            | LS974294 | LS974245 | SCHNIEBS et al.<br>2019 |
| <i>Radix ampla</i> 6                            | Moll S8730        | Russia, Moscow region, Oka River near Turovo, 54°50.836'N, 37°52.799'E                                       | LS974306 | LS974257 | SCHNIEBS et al.<br>2019 |
| <i>Radix ampla</i> 7                            | Tissue coll. 9762 | Russia, Pskov Region, Velikaya River near Kholoye village, N 56°22'28" E 28°58'05"                           | LS974302 | LS974253 | SCHNIEBS et al.<br>2019 |
| <b><i>Radix auricularia</i> (LINNAEUS 1758)</b> |                   |                                                                                                              |          |          |                         |

|                                |            |                                                                                                                                 |          |          |                         |
|--------------------------------|------------|---------------------------------------------------------------------------------------------------------------------------------|----------|----------|-------------------------|
| <i>Radix auricularia</i><br>1  | Moll 50005 | Germany, Saxony, Niederspree, pond Neuwiesenteich, N 51°24'19" E 14°52'57"                                                      | HE573104 | HE573066 | SCHNIEBS et al.<br>2011 |
| <i>Radix auricularia</i><br>2  | Moll 50079 | Germany, Saxony, pond Vierteich near Freitelsdorf, N 51°15'43"E 13°41'57"                                                       | HE573105 | HE573067 | SCHNIEBS et al.<br>2011 |
| <i>Radix auricularia</i><br>3  | Moll 51121 | Rußland: Tomsk Region, nameless waterbody by Novomichailovka near Tomsk                                                         | OM319407 | OM240665 | This paper              |
| <i>Radix auricularia</i><br>4  | Moll 51980 | Bulgaria: Kamchia River 2,5 km north of Staro Oryahovo, N 43,0195° E 27,8245°                                                   | LS974261 | LS974218 | SCHNIEBS et al.<br>2019 |
| <i>Radix auricularia</i><br>5  | Moll 52857 | Russia, Novosibirsk Region, Novosibirsk, Reservoir near Kirza River, N 54°14.224' E 81°39.63114'                                | HE557667 | HE557647 | SCHNIEBS et al.<br>2011 |
| <i>Radix auricularia</i><br>6  | Moll 52859 | Russia, Novosibirsk Region, Novosibirsk, Reservoir near Kirza River, N 54°14.224' E 81°39.63114'                                | HE557668 | HE557646 | SCHNIEBS et al.<br>2011 |
| <i>Radix auricularia</i><br>7  | Moll 53070 | Germany, Bavaria, Weichering, pond in riverside forest, N 48°43'34.1" E 11°19'23.6"                                             | FR797902 | FR797842 | VINARSKI et al.<br>2011 |
| <i>Radix auricularia</i><br>8  | Moll 53086 | Switzerland, Lake Constance near Güttingen                                                                                      | LT623597 | LT623582 | SCHNIEBS et al.<br>2018 |
| <i>Radix auricularia</i><br>9  | Moll S2270 | Turkey, Suganli Valley, 1330 m.a.s.l., N 38 19 49.7 E 34 19 44.5                                                                | OM319408 | OM240666 | This paper              |
| <i>Radix auricularia</i><br>10 | Moll S4653 | France, Saint-Just, Le Bourdelet, northern bank of Ardeche River near the bridge of the road D86, N 44°16'51.73" E 04°37'14.05" | OM319409 | OM240667 | This paper              |
| <i>Radix auricularia</i><br>11 | Moll S5210 | Italy, Sicily, National Park Bosco della Ficuzza, N 7193157 E 33 359030                                                         | HG932122 | HG931934 | This paper              |
| <i>Radix auricularia</i><br>12 | Moll S5211 | Italy, Sicily, National Park Bosco della Ficuzza, N 7193157 E 33 359030                                                         | HG932123 | HG931935 | This paper              |
| <i>Radix auricularia</i><br>13 | Moll S5391 | Russia, Primorye, Bikin River, 176 m.a.s.l., N 46.68983° E 135.75988°                                                           | OM319410 | OM240668 | This paper              |
| <i>Radix auricularia</i><br>14 | Moll S5393 | China, Hebei Province, Guyan, Zhangjiakou City, 1401 m.a.s.l., N 41.6833333° E 115.7741667°                                     | OM319411 | OM240669 | This paper              |
| <i>Radix auricularia</i><br>15 | Moll S5395 | China, Hebei Province, Guyan, Zhangjiakou City, 1401 m.a.s.l., N 41.6833333° E 115.7741667°                                     | OM319412 | OM240670 | This paper              |
| <i>Radix auricularia</i><br>16 | Moll S5396 | China, Hebei Province, Guyan, Zhangjiakou City, 1401 m.a.s.l., N 41.6833333° E 115.7741667°                                     | OM319413 | OM240671 | This paper              |
| <i>Radix auricularia</i><br>17 | Moll S5793 | Switzerland, Feldmeilen, bank oft he Lake Zürich near road Seestraße, N 47°16'18.16" E 08°37'40.46"                             | OM319414 | OM240672 | This paper              |
| <i>Radix auricularia</i><br>18 | Moll S6596 | Kyrgyzstan, Chu River, 1505 m.a.s.l., N 42°31.520' E 75°49.235'                                                                 | HG932124 | HG931936 | This paper              |
| <i>Radix auricularia</i><br>19 | Moll S6597 | Kyrgyzstan, Chu River, 1505 m.a.s.l., N 42°31.520' E 75°49.235'                                                                 | HG932125 | HG931937 | This paper              |

|                                |                      |                                                                                                     |          |          |                         |
|--------------------------------|----------------------|-----------------------------------------------------------------------------------------------------|----------|----------|-------------------------|
| <i>Radix auricularia</i><br>20 | Moll S6599           | Kyrgyzstan, Karakal Region, fish pond near Tup, 1623 m.a.s.l., N 42°42.777' E 78°22.506'            | OM319415 | OM240673 | This paper              |
| <i>Radix auricularia</i><br>21 | Moll S6600           | Kyrgyzstan, Karakal Region, fish pond near Tup, 1623 m.a.s.l., N 42°42.777' E 78°22.506'            | OM319416 | OM240674 | This paper              |
| <i>Radix auricularia</i><br>22 | Moll S6803           | Russia, Republic of Sakha, Yakutsk, Lake Saisary, N 62°01.045' E 129° 41.527'                       | OM319417 | OM240675 | This paper              |
| <i>Radix auricularia</i><br>23 | Moll S6811           | Western Mongolia, Chono-Khoraikhol River, N 48° 20.013' E 92° 49.543'                               | OM319418 | OM240676 | This paper              |
| <i>Radix auricularia</i><br>24 | Moll S6815           | Russia, Republic of Buryatia, Lake Baikal, Kotovo Bay near Monakhovo, N 53° 39.011' E 108° 58.587'  | LS974264 | LS974219 | SCHNIEBS et al.<br>2019 |
| <i>Radix auricularia</i><br>25 | Moll S6816           | Russia, Republic of Buryatia, Lake Baikal, Kotovo Bay near Monakhovo, N 53° 39.011' E 108° 58.587'  | OM319419 | OM240677 | This paper              |
| <i>Radix auricularia</i><br>26 | Moll S6836           | Western Mongolia, Lake Airag-Nuur, N 48° 52.110' E 93° 23.689'                                      | OM319420 | OM240678 | This paper              |
| <i>Radix auricularia</i><br>27 | Moll S6840           | Tunisia, artificial water reservoir near Khammamet, N 36° 26.658' E 10° 40.598'                     | LS974265 | LS974220 | SCHNIEBS et al.<br>2019 |
| <i>Radix auricularia</i><br>28 | Moll S7384           | Denmark: Soro, lake Degnemosen, N 55.699417 E 12.504774                                             | LS974263 | LS974221 | SCHNIEBS et al.<br>2019 |
| <i>Radix auricularia</i><br>29 | Moll S7495           | Mecklenburg-West Pomerania, Lake Tollensesees near Klein Nemerow, N 53.499711 E 13.220142           | OM319421 | OM240679 | This paper              |
| <i>Radix auricularia</i><br>30 | Moll S7496           | Mecklenburg-West Pomerania, Lake Tollensesees near Klein Nemerow, N 53.499711 E 13.220142           | OM319422 | OM240680 | This paper              |
| <i>Radix auricularia</i><br>31 | Moll S7525           | Hungria, Borsod-Abaúj-Zemplén, oxbow of Botrog River near Sarospatak, N 48°17'38.64" E 21°34'58.08" | OM319423 | OM240681 | This paper              |
| <i>Radix auricularia</i><br>32 | Moll S8736           | Russia, Volga River delta, Katyushkin Erik channel, N 45.779410 E 47.872876                         | LS974262 | LS974222 | SCHNIEBS et al.<br>2019 |
| <i>Radix intercosa</i> 1       | Moll S5127           | Russia, Republic of Buryatia, pond on the bank of Lake Baikal near Katun, N 53°41' E 109°17'        | OM319424 | OM240682 | This paper              |
| <i>Radix intercosa</i> 2       | Moll S5128           | Russia, Republic of Buryatia, pond on the bank of Lake Baikal near Katun, N 53°41' E 109°17'        | OM319425 | OM240683 | This paper              |
| <i>Radix intercosa</i> 3       | Tissue coll.<br>8903 | Russia, Republic of Buryatia, pond on the bank of Lake Baikal near Katun, N 53°41' E 109°17'        | OM319426 | OM240684 | This paper              |
| <i>Radix intercosa</i> 4       | Moll S7341           | Russia, Republic of Buryatia, Lake Baikal, Fertik Bay near the mouth of the Chivyrkuy Bay           | OM319427 | OM240685 | This paper              |
| <i>Radix iturupica</i> 1       | Moll S6871           | Russia, Kuril Islands, Kunashir Island, channel of the Lake Peschanoe, N 43°527' E 145°30'51"       | OM319428 | OM240686 | This paper              |
| <i>Radix iturupica</i> 2       | Moll S6872           | Russia, Kuril Islands, Kunashir Island, channel of the Lake Peschanoe, N 43°527' E 145°30'51"       | OM319429 | OM240687 | This paper              |

|                               |                   |                                                                                                             |          |          |            |
|-------------------------------|-------------------|-------------------------------------------------------------------------------------------------------------|----------|----------|------------|
| <i>Radix narzykulovi</i><br>1 | Tissue coll. 9734 | Tadjikistan, Lake Torantuykul                                                                               | OM319430 | OM240688 | This paper |
| <i>Radix narzykulovi</i><br>2 | Tissue coll. 9734 | Tadjikistan, Lake Torantuykul                                                                               | OM319431 | OM240689 | This paper |
| <i>Radix schubinae</i>        | Moll S7376        | Russia, Amur Region, pit filled with water in Zeya, N 53°44.657', E 127°16.759'                             | OM319432 | OM240690 | This paper |
| <i>Radix ussuriensis</i><br>1 | Moll S7391        | Russia, Region Khabarowsk, waterbody in the floodplain near Samarka                                         | OM319433 | —        | This paper |
| <i>Radix ussuriensis</i><br>2 | Moll S7392        | Russia, Region Khabarowsk, waterbody in the floodplain near Samarka                                         | —        | OM240691 | This paper |
| <i>Radix</i> Baikal 1         | Moll S9593        | Russia, Lake Baikal north of Buguldeyka, 2-3 m depth                                                        | —        | OM240692 | This paper |
| <i>Radix</i> Baikal 2         | Moll S9594        | Russia, Lake Baikal north of Buguldeyka, 2-3 m depth                                                        | OM319434 | OM240693 | This paper |
| <i>Radix</i> Baikal 3         | Moll S9596        | Russia, Lake Baikal north of Cape Elokhin, 4-10 m depth                                                     | OM319435 | OM240694 | This paper |
| <i>Radix</i> Baikal 4         | Moll S9597        | Russia, Lake Baikal north of Cape Elokhin, 4-10 m depth                                                     | OM319436 | OM240695 | This paper |
| <i>Radix</i> Baikal 5         | Moll S9600        | Russia, southern Lake Baikal, Cape Zub (Khabartuy), dredged, 3-10 m depth                                   | —        | OM240696 | This paper |
| <i>Radix</i> Baikal 6         | Moll S9601        | Russia, southern Lake Baikal, Cape Zub (Khabartuy), dredged, 3-10 m depth                                   | OM319437 | OM240697 | This paper |
| <i>Radix</i> Baikal 7         | Moll S9604        | Russia, Lake Baikal, Maloye More, Kharin-Irgin Bay, on stones, 1.2 m depth                                  | —        | OM240698 | This paper |
| <i>Radix</i> Baikal 8         | Moll S9606        | Russia, Lake Baikal, Senogda Bay, in a depth of 1.5 m, stones                                               | OM319438 | OM240699 | This paper |
| <i>Radix</i> Baikal 9         | Moll S9607        | Russia, Lake Baikal, Senogda Bay, stones, 1.5 m depth                                                       | OM319439 | OM240700 | This paper |
| <i>Radix</i> Baikal 10        | Moll S9610        | Russia, Lake Baikal, Maloye More, Shibetetskaya Bay, fine muddy sand, <i>Chara</i> , dredged, 24-25 m depth | OM319440 | OM240701 | This paper |
| <i>Radix</i> Baikal 11        | Moll S9611        | Russia, Lake Baikal, Maloye More, Shibetetskaya Bay, fine muddy sand, <i>Chara</i> , dredged, 24-25 m depth | OM319441 | OM240702 | This paper |
| <i>Radix</i> Baikal 12        | Moll S9614        | Russia, Lake Baikal, Listvenichnoe, 1-9 m depth                                                             | OM319442 | OM240703 | This paper |
| <i>Radix</i> Baikal 13        | Moll S9615        | Russia, Lake Baikal, Listvenichnoe, 1-9 m depth                                                             | OM319443 | OM240704 | This paper |
| <i>Radix</i> Baikal 14        | Moll S9618        | Russia, Lake Baikal, Bolshie Koty, groundwater pool 3-5 m from the shore                                    | —        | OM240705 | This paper |
| <i>Radix</i> Baikal 15        | Moll S9620        | Russia, northern Lake Baikal, Slyudyanskiy Cape, 2.8-3.2 m depth                                            | OM319444 | OM240706 | This paper |
| <i>Radix</i> Baikal 16        | Moll S9622        | Russia, northern Lake Baikal, Valukan Cape, on gravel in the shoreline, ca. 10-15 cm depth                  | OM319445 | OM240707 | This paper |
| <i>Radix</i> Baikal 17        | Moll S9623        | Russia, northern Lake Baikal, Valukan Cape, on gravel in the shoreline, ca. 10-15 cm depth                  | OM319446 | OM240708 | This paper |
| <i>Radix</i> Baikal 18        | Moll S9626        | Russia, Lake Baikal, Ayaya Bay, stones, 0.5 m depth                                                         | OM319447 | OM240709 | This paper |
| <i>Radix</i> Baikal 19        | Moll S9627        | Russia, Lake Baikal, Ayaya Bay, stones, 0.5 m depth                                                         | OM319448 | OM240710 | This paper |
| <i>Radix</i> Baikal 20        | Moll S9629        | Russia, Lake Baikal, Zhilische, 2.5-4.2 m depth                                                             | OM319449 | OM240711 | This paper |
| <i>Radix</i> Baikal 21        | Moll S9630        | Russia, Lake Baikal, Zhilische, 2.5-4.2 m depth                                                             | OM319450 | OM240712 | This paper |
| <i>Radix</i> Baikal 22        | Moll S9633        | Russia, Lake Baikal near Zarechnoe, stones, 0.5 m depth                                                     | OM319451 | OM240713 | This paper |
| <i>Radix</i> Baikal 23        | Moll S9634        | Russia, Lake Baikal near Zarechnoe, stones, 0.5 m depth                                                     | OM319452 | OM240714 | This paper |
| <i>Radix</i> Baikal 24        | Moll S9637        | Russia, northern Lake Baikal, Bolshaya Kosa Bay (near Muzhinay), dredged, 30 m depth                        | —        | OM240715 | This paper |

|                        |            |                                                                                         |   |          |            |
|------------------------|------------|-----------------------------------------------------------------------------------------|---|----------|------------|
| <i>Radix</i> Baikal 25 | Moll S9638 | Russia, northern Lake Baikal, Bolshaya Kosa Bay (near Muzhinay), dredged, 30 m depth    | — | OM240716 | This paper |
| <i>Radix</i> Baikal 26 | Moll S9640 | Russia, Lake Baikal, Ayaya Bay, sand, dredged, 15 m depth                               | — | OM240717 | This paper |
| <i>Radix</i> Baikal 27 | Moll S9641 | Russia, Lake Baikal, Ayaya Bay, sand, dredged, 15 m depth                               | — | OM240718 | This paper |
| <i>Radix</i> Baikal 28 | Moll S9643 | Russia, Lake Baikal, mouth of the River Babushka near Peschanaya Bay, gravel, 5 m depth | — | OM240719 | This paper |
| <i>Radix</i> Baikal 29 | Moll S9644 | Russia, Lake Baikal, mouth of the River Babushka near Peschanaya Bay, gravel, 5 m depth | — | OM240720 | This paper |
| <i>Radix</i> Baikal 30 | Moll S9645 | Russia, River Angara near Usol'e-Sibirskoe, stones and sand, 0-30 cm depth              | — | OM240721 | This paper |
| <i>Radix</i> Baikal 31 | Moll S9646 | Russia, River Angara near Usol'e-Sibirskoe, stones and sand, 0-30 cm depth              | — | OM240722 | This paper |
| <i>Radix</i> Baikal 32 | Moll S9654 | Russia, Republic of Buryatia, River Pereyemnaja at his mouth in to the Lake Baikal      | — | OM240723 | This paper |
